# Supplementary material
Source: Research Square preprint supplement (doi:10.21203/rs.3.rs-9562745/v1)
Supplement: Supplementary file 1 [file 1479a0a973f5fbd530e2a3e2.docx]

**Supplementary Materials**

For the manuscript: "The Affordable Intervention Cost Ceiling: a burden-derived economic framework for cardiovascular–kidney–metabolic prevention in China, Japan, and South Korea."

Contents:

Supplementary Table S1. GBD 2023 CKM-related DALYs by country and disease category (central estimates and 95% UIs).

Supplementary Table S2. Single-risk PAFs and two alternative joint-PAF methods (multiplicative and max-single), per country × cause.

Supplementary Table S3. Monte Carlo simulation parameters (10,000 iterations, seed 20260201).

Supplementary Table S4. Break-even effectiveness calculation per drug × country.

Supplementary Table S5. Drug price concordance — original sources, access dates, product codes, currency conversions.

Supplementary Table S6. CKM stage prevalence and hazard ratios — primary-source data from the three cohort studies cited.

Supplementary Table S7. DALY valuation anchors — supply-side opportunity cost, 1× GDP per capita, and Ochalek et al. estimates.

Supplementary Table S8. Sensitivity analysis: All-ages versus 30+ denominator (approximate).

Supplementary Figure S1. Analytical flow — from GBD burden inputs to country-specific AICCs.

Supplementary Figure S2. Tornado diagram — parameter sensitivity for the Chinese AICC.

**Supplementary Table S1. GBD 2023 CKM-related DALYs by country and disease category (All ages, 2023)**

All values are central estimates, both sexes combined (Male + Female summed). 95% UIs shown are sum-of-sex bounds. CKM disease categories per AHA 2023 CKM Presidential Advisory. Values directly extracted from the GBD 2023 "Number" metric for "DALYs (Disability-Adjusted Life Years)".

| **Country** | **CKM disease category** | **DALYs (millions)** | **95% UI low** | **95% UI high** |
| --- | --- | --- | --- | --- |
| China | Ischaemic heart disease | 36.88 | 31.14 | 42.51 |
| China | Stroke (ischaemic + haemorrhagic) | 42.69 | 36.13 | 48.81 |
| China | Type 2 diabetes | 10.92 | 8.03 | 13.93 |
| China | Chronic kidney disease | 5.09 | 4.16 | 6.06 |
| China | Hypertensive heart disease | 5.00 | 3.19 | 6.62 |
| **China** | **Subtotal** | **100.58** | **82.65** | **117.94** |
| Japan | Ischaemic heart disease | 2.21 | 1.87 | 2.50 |
| Japan | Stroke (ischaemic + haemorrhagic) | 2.54 | 2.10 | 2.86 |
| Japan | Type 2 diabetes | 1.37 | 1.01 | 1.80 |
| Japan | Chronic kidney disease | 1.03 | 0.84 | 1.19 |
| Japan | Hypertensive heart disease | 0.23 | 0.17 | 0.28 |
| **Japan** | **Subtotal** | **7.38** | **5.98** | **8.63** |
| Rep. of Korea | Ischaemic heart disease | 0.49 | 0.40 | 0.57 |
| Rep. of Korea | Stroke (ischaemic + haemorrhagic) | 0.65 | 0.54 | 0.74 |
| Rep. of Korea | Type 2 diabetes | 0.58 | 0.43 | 0.75 |
| Rep. of Korea | Chronic kidney disease | 0.25 | 0.18 | 0.31 |
| Rep. of Korea | Hypertensive heart disease | 0.08 | 0.05 | 0.13 |
| **Rep. of Korea** | **Subtotal** | **2.04** | **1.61** | **2.49** |
| **Three-country total** | **—** | **110.00** | **90.24** | **129.06** |

Data source: GBD 2023, Institute for Health Metrics and Evaluation (https://ghdx.healthdata.org). Extracted from files IHME-GBD_2023_DATA-a94a6759 (China+Japan) and IHME-GBD_2023_DATA-c36d9034 (Rep. of Korea), accessed by the corresponding author. Totals may not sum exactly due to rounding.

**Supplementary Table S2. Single-risk PAFs and joint-PAF methods by country × cause**

Single-risk PAFs are from the GBD 2023 "Percent" metric for DALYs (All ages, sex-combined via attributable-number weighting). Multiplicative joint PAF = 1 − ∏(1 − PAF_k). Max single-risk PAF = max_k(PAF_k), reported as a conservative lower bound. "—" indicates the risk-factor is not attributed to that cause in GBD.

| **Country** | **Cause** | **SBP** | **FPG** | **BMI** | **LDL-C** | **KidneyDys** | **Joint mult.** | **Joint max** |
| --- | --- | --- | --- | --- | --- | --- | --- | --- |
| China | IHD | 0.533 | 0.132 | 0.079 | 0.342 | 0.123 | 0.784 | 0.533 |
| China | Stroke | 0.600 | 0.102 | 0.027 | 0.132 | 0.090 | 0.724 | 0.600 |
| China | T2D | — | 1.000 | 0.484 | — | — | 1.000 | 1.000 |
| China | CKD | 0.215 | 0.350 | 0.149 | — | 1.000 | 1.000 | 1.000 |
| China | HHD | 1.000 | — | 0.353 | — | — | 1.000 | 1.000 |
| Japan | IHD | 0.532 | 0.142 | 0.070 | 0.326 | 0.190 | 0.796 | 0.532 |
| Japan | Stroke | 0.570 | 0.134 | 0.021 | 0.156 | 0.103 | 0.724 | 0.570 |
| Japan | T2D | — | 1.000 | 0.430 | — | — | 1.000 | 1.000 |
| Japan | CKD | 0.304 | 0.428 | 0.207 | — | 1.000 | 1.000 | 1.000 |
| Japan | HHD | 1.000 | — | 0.315 | — | — | 1.000 | 1.000 |
| Rep. Korea | IHD | 0.406 | 0.144 | 0.081 | 0.315 | 0.128 | 0.721 | 0.406 |
| Rep. Korea | Stroke | 0.462 | 0.113 | 0.027 | 0.149 | 0.075 | 0.634 | 0.462 |
| Rep. Korea | T2D | — | 1.000 | 0.463 | — | — | 1.000 | 1.000 |
| Rep. Korea | CKD | 0.186 | 0.370 | 0.158 | — | 1.000 | 1.000 | 1.000 |
| Rep. Korea | HHD | 1.000 | — | 0.345 | — | — | 1.000 | 1.000 |

Country-level joint PAFs applied to each cause, then weighted by cause DALY share, give country-level attributable burden shares: China 80.4% (mult) / 65.9% (max); Japan 84.4% / 71.2%; Rep. of Korea 81.7% / 68.7%. For CKD, T2D, and HHD, joint PAF reaches 1.000 under both methods because at least one single risk factor (Kidney dysfunction for CKD; FPG for T2D; SBP for HHD) has PAF = 1.000 in GBD — reflecting definitional closure.

**Supplementary Table S3. Monte Carlo simulation parameters**

10,000 iterations, seed 20260201. Python 3.11 / NumPy 1.26.

| **Parameter** | **Distribution** | **Central** | **95% range** | **Source** |
| --- | --- | --- | --- | --- |
| Attributable DALY, China (mult) | Normal | 80.8 M | 66.4–92.9 M | GBD 2023 UI × joint PAF |
| Attributable DALY, Japan (mult) | Normal | 6.2 M | 5.05–7.28 M | GBD 2023 UI × joint PAF |
| Attributable DALY, Korea (mult) | Normal | 1.67 M | 1.31–2.04 M | GBD 2023 UI × joint PAF |
| DALY valuation, China (supply) | Triangular | $6,390 | $4,500–$8,150 | Ochalek 2018 + Herrera-Araujo 2020 correction |
| DALY valuation, Japan (supply) | Triangular | $26,280 | $22,000–$31,000 | Shiroiwa 2013 WTP → 2023 USD |
| DALY valuation, Korea (supply) | Triangular | $21,460 | $18,000–$25,300 | Bae 2018 Model 3 → 2023 USD |
| Antihypertensive real-world RRR | Normal | 0.138 | 0.110–0.165 | Ettehad 2016 × Naderi 2012 |
| Statin real-world RRR | Normal | 0.121 | 0.099–0.143 | CTT 2010 × Naderi 2012 |
| SGLT2i real-world RRR | Normal | 0.121 | 0.088–0.154 | SMART-C pooled × adherence |
| Population, China (All ages) | Fixed | 1,430.6 M | — | GBD 2023 age-structure sum |
| Population, Japan (All ages) | Fixed | 124.7 M | — | GBD 2023 age-structure sum |
| Population, Korea (All ages) | Fixed | 51.7 M | — | GBD 2023 age-structure sum |
| Discount rate (10-year) | Fixed | 3% | — | WHO-CHOICE convention |

**Supplementary Table S4. Break-even effectiveness per drug × country**

Break-even effectiveness η* = (annual price × population) / (class-level attributable DALY × DALY value). Status: PASS = η* < real-world effectiveness; CONCERN = η* ≥ real-world effectiveness. All monetary values in 2023 USD.

| **Country** | **Drug** | **Class** | **Price $/yr** | **AICC $/yr** | **η* (%)** | **η used** | **Status** |
| --- | --- | --- | --- | --- | --- | --- | --- |
| China | Amlodipine | Anti-HTN | 3.61 | 361 | 2.0% | 13.8% | PASS |
| China | Atorvastatin | Statin | 9.79 | 361 | 12.0% | 12.1% | PASS (razor) |
| China | Dapa pre-VBP | SGLT2i | 224.77 | 361 | 110% | 12.1% | CONCERN |
| China | Dapa post-VBP | SGLT2i | 14.43 | 361 | 7.0% | 12.1% | CONCERN |
| Japan | Amlodipine | Anti-HTN | 28.06 | 1,313 | 4.6% | 13.8% | PASS |
| Japan | Atorvastatin | Statin | 28.97 | 1,313 | 3.9% | 12.1% | CONCERN (razor) |
| Japan | Dapa branded | SGLT2i | 365.26 | 1,313 | 48.7% | 12.1% | CONCERN |
| Japan | Dapa gen T2DM | SGLT2i | 187.05 | 1,313 | 51.0% | 12.1% | CONCERN |
| Rep. Korea | Amlodipine | Anti-HTN | 52.54 | 691 | 21.0% | 13.8% | CONCERN |
| Rep. Korea | Atorvastatin | Statin | 186.97 | 691 | 180.1% | 12.1% | CONCERN (severe) |
| Rep. Korea | Dapagliflozin | SGLT2i | 109.84 | 691 | 59.8% | 12.1% | CONCERN |

**Supplementary Table S5. Drug price concordance (April 2026 prices, USD 2023 conversion)**

| **Country** | **Molecule** | **Dose** | **Local price** | **Product code** | **USD/yr** | **Source** |
| --- | --- | --- | --- | --- | --- | --- |
| China | Amlodipine | 5 mg bes. | ¥0.07/tab | VBP (non-disc.) | 3.61 | NHSA VBP 2025 |
| China | Atorvastatin | 20 mg | ¥0.19/tab | VBP (non-disc.) | 9.79 | NHSA VBP rounds |
| China | Dapagliflozin | 10 mg | ¥0.28/tab | 11th VBP | 14.43 | NHSA Oct 2025 |
| Japan | Amlodipine OD | 5 mg | ¥10.80/tab | YJ generic | 28.06 | MHLW Apr 2026 |
| Japan | Atorvastatin | 10 mg | ¥10.80–11.50 | YJ generic | 28.06–29.88 | MHLW Apr 2026 |
| Japan | Dapa generic | 10 mg | ¥74.00/tab | YJ 3969019F1022 | 187.05 | MHLW Dec 2025 |
| Japan | Forxiga (brand) | 10 mg | ¥140.60/tab | YJ 3969019F2023 | 365.26 | MHLW 令和8年3月5日 |
| Rep. Korea | Amlodipine | 5 mg | ₩188/tab | 642101120 | 52.54 | HIRA 2025-08-01 |
| Rep. Korea | Atorvastatin | 20 mg | ₩669/tab | 643503650 | 186.97 | HIRA 2025-08-01 |
| Rep. Korea | Dapagliflozin | 10 mg | ₩393/tab | 640007870 | 109.84 | HIRA 2025-08-01 |

IMF IFS 2023 annual averages: CNY 6.4409/USD, JPY 140.49/USD, KRW 1,305.36/USD. HIRA listing Excel file (약제급여목록및급여상한금액표_2025-08-01.xlsx) available on request for direct verification of the three Korean SKUs.

**Supplementary Table S6. CKM stage prevalence and hazard ratios — primary-source data**

| **Country** | **Stage 0** | **Stage 1** | **Stage 2** | **Stage 3** | **Stage 4** | **Source** |
| --- | --- | --- | --- | --- | --- | --- |
| China — prev. % | 18.8 | 19.4 | 42.0 | 11.2 | 8.6 | Zheng 2025, n=33,685 |
| Japan — prev. % | 10.71 | 9.13 | 65.04 | 6.57 | 8.54 | Fujimoto 2026 Analysis 1, n=386,551 |
| Korea — prev. % | 17.4 | 15.7 | 57.5 | 6.3 | 3.1 | Kim HJ 2025 KJIM, n=1,497,913 |
| Japan HR — CV death | 1.00 | 0.86 | 1.07 | 1.92 | 3.16 | Fujimoto 2026 Table 4 |
| Korea HR — composite | 1.00 | 1.09 | 1.36 | 1.72 | 2.70 | Kim HJ 2025 Model 3 |

**Supplementary Table S7. DALY valuation anchors (USD 2023 per DALY averted)**

| **Country** | **Supply-side (primary)** | **1× GDP per capita** | **Ochalek 2018 elasticity** |
| --- | --- | --- | --- |
| China | $6,390 (95% UI $4,500–$8,150) | $12,720 (2023) | $3,710–$5,560 |
| Japan | $26,280 (95% UI $22,000–$31,000) | $33,850 (2023) | $19,400–$27,800 |
| Rep. of Korea | $21,460 (95% UI $18,000–$25,300) | $33,120 (2023) | $17,200–$24,700 |

**Supplementary Table S8. Sensitivity analysis: All-ages versus 30+ denominator (approximate)**

The main analysis uses the All-ages denominator (per GBD 2023 extraction). As a transparency check, we approximate the 30+ subset AICC under the assumption that ≥95% of CKM-related DALYs accrue in ages 30+ while the 30+ share of total population is 70–75%. Under these assumptions, the 30+ AICC is approximately 1.30–1.40× the All-ages AICC.

| **Country** | **All-ages AICC** | **30+ approx. low** | **30+ approx. high** | **Change direction** |
| --- | --- | --- | --- | --- |
| China | $361 | $470 | $505 | +30–40% |
| Japan | $1,313 | $1,710 | $1,840 | +30–40% |
| Rep. of Korea | $691 | $900 | $970 | +30–40% |

The heterogeneity pattern across the three countries is preserved: China-to-Japan ratio and China-to-Korea ratio are unchanged by the denominator choice. All drug margins scale proportionally. A formal 30+ sensitivity would require age-disaggregated GBD data download; we provide the approximation here to demonstrate that the headline conclusion — heterogeneous procurement success — is robust to this methodological choice.

**Supplementary Figure S1. Analytical flow**

Step 1: GBD 2023 CKM-related DALYs (Table S1, 9 CSV files aggregated).

↓

Step 2: Mediation-adjusted multiplicative joint PAF (Table S2).

↓ Attributable DALY (80.8 / 6.2 / 1.67 M)

Step 3: DALY valuation applied (Table S7, three anchors).

↓ WTP envelope

Step 4: All-ages population scaling (GBD 2023).

↓ AICC per person per year ($361 / $1,313 / $691)

Step 5: 10,000-iteration Monte Carlo uncertainty propagation (Table S3).

↓ 95% UI

Step 6: Comparison with actual April-2026 drug prices (Table S5) → margins per country × drug (Table 2; Figure 3).

**Supplementary Figure S2. Tornado diagram — parameter sensitivity for the Chinese AICC**

| **Parameter** | **Low scenario** | **High scenario** | **Fold variation** |
| --- | --- | --- | --- |
| DALY valuation ($4,500 → $8,150) | $261/p/yr | $465/p/yr | 1.8× |
| PAF method (mult → max) | $296/p/yr | $361/p/yr | 1.2× |
| Attributable DALY (GBD 95% UI) | $328/p/yr | $395/p/yr | 1.2× |
| Real-world RRR (±20%) | $353/p/yr | $370/p/yr | 1.05× |

Base-case AICC for China = $361. Under all tested parameter combinations, generic amlodipine at $3.61/year remained more than 70-fold below the AICC; post-VBP dapagliflozin at $14.43/year remained at 18-fold or better.

End of Supplementary Materials.
