# Supplementary material
Source: Research Square preprint supplement (doi:10.21203/rs.3.rs-9562745/v1)
Supplement: Supplementary file 2 [file cc24cef6860c8c2d83ec8f5f.docx]

**Plain Language Summary**

For the manuscript: "The Affordable Intervention Cost Ceiling: a burden-derived economic framework for cardiovascular–kidney–metabolic prevention in China, Japan, and South Korea."

**What question did we ask?**

If a country wants to spend money on preventing heart, kidney, and metabolic disease, what is a reasonable upper limit per person per year — given the burden that country already carries? And do three similar-income East Asian countries reach that limit in the same way?

**What did we do?**

We built a simple formula, the Affordable Intervention Cost Ceiling (AICC). It takes three numbers a country already collects. First, the avoidable disease burden in disability-adjusted life years (DALYs), from the Global Burden of Disease Study 2023. Second, a monetary value per DALY averted, anchored in each country’s own healthcare budget. Third, the population size. Multiplying and dividing gives the ceiling.

We applied the formula to China, Japan, and South Korea, using drug prices current to April 2026. That includes China’s national volume-based procurement (VBP) prices, Japan’s April 2026 drug-price revision, and the HIRA listings for Korean generics.

**What did we find?**

The ceilings were $361 per person per year in China, $1,313 in Japan, and $691 in South Korea. Drug-price margins below these ceilings differ a lot across the three countries.

In China, generic amlodipine costs $3.61 per year — 100 times below the ceiling. After last year’s VBP, dapagliflozin fell from $224.77 to $14.43, giving a 25-fold margin. In Japan, common antihypertensives and statins sit 45-fold below the ceiling, but branded SGLT2 inhibitors only 4-fold. South Korea is the tightest of the three: amlodipine 13-fold below, atorvastatin only 4-fold, dapagliflozin 6-fold. For Korean atorvastatin the implied break-even effectiveness is above 100%, which is higher than any plausible real-world clinical effect.

**Why does it matter?**

What matters for policy differs by country. In China, where drug prices have already fallen dramatically, the harder problem now is reaching patients and keeping them on treatment. Japan still has room to negotiate SGLT2 prices down. South Korea shows something the "generic entry should fix it" intuition did not predict — prices have not compressed to the level the burden would justify. A single framework lets us see all three patterns in the same dollar unit, which country-specific cost-effectiveness analyses cannot.

**Who might use this?**

Ministries of health, payers, and HTA agencies in middle-income countries that already run burden-of-disease surveillance. The calculation uses no proprietary data and can be updated every year.

**What are the main caveats?**

The AICC is a pre-HTA screen, not a replacement for a full cost-effectiveness analysis. We use the all-ages population as the denominator; if we restricted it to adults 30 and over, the ceiling would rise by roughly 30–40%, but the pattern of differences across the three countries would not change. Our numbers depend on the GBD burden estimates and on the valuation anchor chosen. We report three anchors and propagate uncertainty through 10,000 Monte Carlo iterations.
